# Supplementary material for: Fabrication and evaluation of adhesion enhanced flexible carbon nanotube transparent conducting films
Source: Royal Society of Chemistry journal article supplement (doi:10.1039/c5tc00138b), 2015-01-01
Supplement: c5tc00138b1.pdf [file c5tc00138b1.pdf]

**Supplementary materials:**

**Fabrication and evaluation of adhesion enhanced flexible carbon nanotube  
transparent conducting films**

**Yan Wang, Hai-Jie Yang, Hong-Zhang Geng\*, Ze-Chen Zhang, Er-Xiong Ding, Yan  
Meng, Zhi-Jia Luo, Jing Wang, Xiao-Mei Su and Shi-Xun Da**

State Key Laboratory of Hollow Fiber Membrane Materials & Membrane Processing, School  
of Material Science and Engineering, Tianjin Polytechnic University, Tianjin, 300387, PR  
China

**\*Email: [genghz@tjpu.edu.cn](mailto:genghz@tjpu.edu.cn)**

### Supporting materials:

A large area uniform TCF sample, like A3 paper size, with excellent transmittance fabricated using PAA solution is shown in Fig. S1.

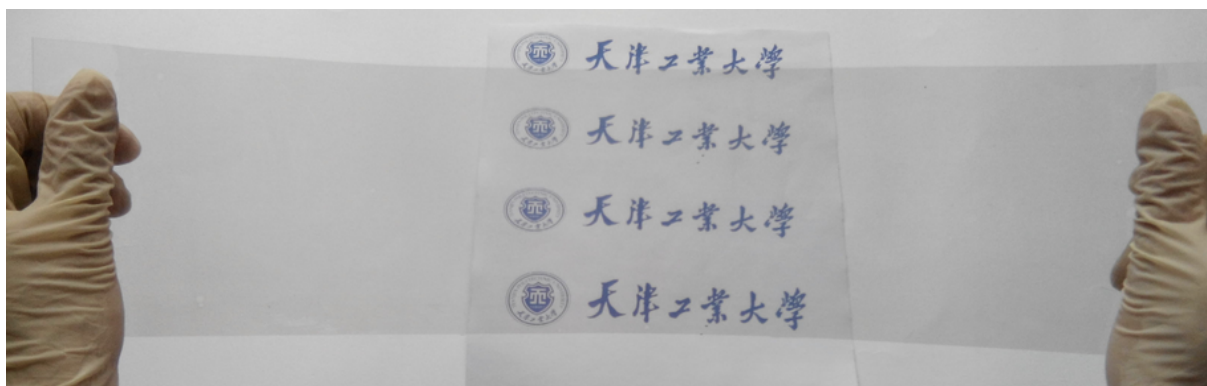

**Fig. S1 Sample image of a large area CNT film.**

CNT films can be bent all the way without a significant change in sheet resistance (Fig. S2). And after 3000 cycles test, the sheet resistance of CNT films has only a minor increase about 3% as shown in Fig. S3. Hence, SWCNT/PET film performs excellent flexibility.

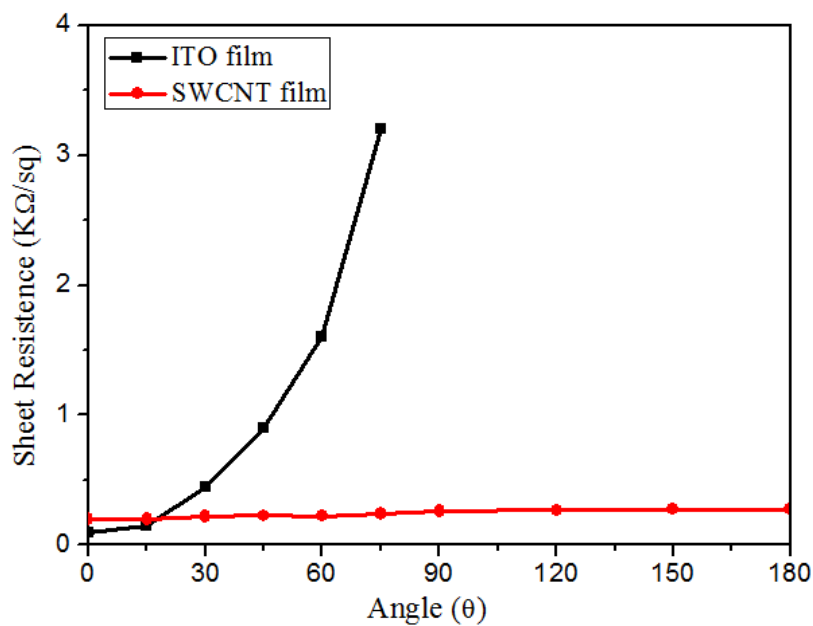

**Fig. S2 Flexibility study of SWCNT/PET vs. ITO/PET with sheet resistance as a function of bending angle.**

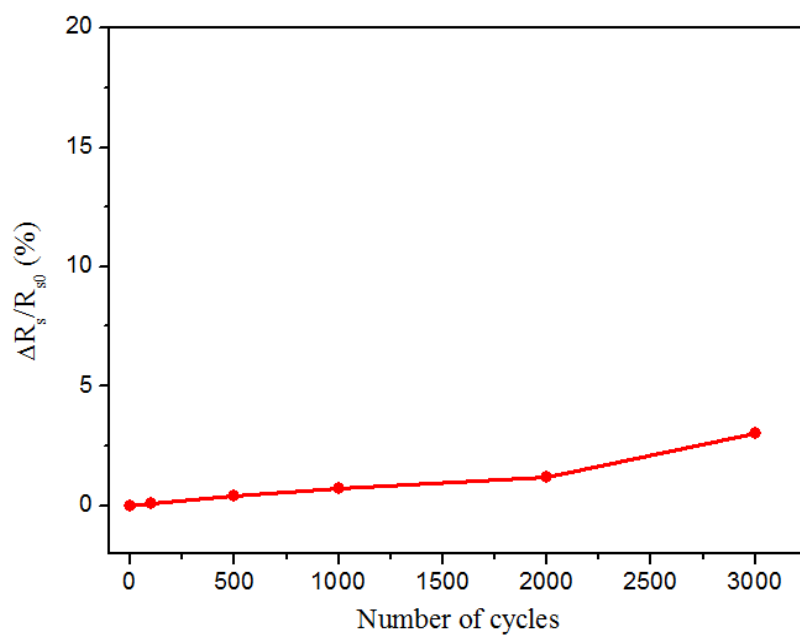

**Fig. S3 Cyclic testing of CNT coating on PET substrate.**

## REFERENCES

- [1] N. Saran, K. Parikh, D. S. Suh, E. Muñoz, H. Kolla, and S. K. Manohar. Fabrication and characterization of thin films of single-walled carbon nanotube bundles on flexible plastic substrates. *Journal of the American Chemical Society*, 2004, 126(14): 4462-4463.
- [2] L. Hu, D. S. Hecht, and G. Gruner. Carbon nanotube thin films: fabrication, properties, and applications. *Chemical Reviews*, 2010, 110(10): 5790-5844.
